# Supplementary material for: Sexual Harassments Related to Alcohol and Drugs Intake: The Experience of the Rape Centre of Turin
Source: Int J Environ Res Public Health. 2022 Nov 16;19(22):15090. doi: 10.3390/ijerph192215090 (PMC9690951; doi:10.3390/ijerph192215090)
Supplement: Supplementary file 1 [file ijerph-19-15090-s001.zip › ijerph-1990515-supplementary.pdf]

## Supplementary materials

# Sexual harassments related to alcohol and drugs intake: the experience of the Rape Centre of Turin

Mognetti et al.

### Content list:

1. **Table S1:** Type of injuries detected
2. **Table S2:** Toxicological findings stratified by time from abuse to medical examination, age class, type of aggressor and presence of injuries.
3. **Table S3:** number of women reporting different signs/symptoms at clinical examination
4. **Supplementary Item S1:** raw data collection sheet
5. **Supplementary Item S2:** details on psychic manifestations coding

**Table S1:** Type of injuries detected.

| Type of injuries detected                                        | Total n=117 (%) |
|------------------------------------------------------------------|-----------------|
| Only blunt wounds                                                | 107 (91.5)      |
| Only cold steel injuries                                         | 1 (0.8)         |
| Blunt wounds and cold steel injuries                             | 3 (2.6)         |
| Blunt wounds and scars from previous episodes of gender violence | 4 (3.4)         |
| Only scars from previous episodes of gender violence             | 2 (1.7)         |

Note: In brackets, values are expressed as percentage of the total

**Table S2:** Toxicological findings stratified by time from abuse to medical examination, age class, type of aggressor and presence of injuries.

|                                  | <i>Toxicological findings</i> |                               |              |                         |
|----------------------------------|-------------------------------|-------------------------------|--------------|-------------------------|
|                                  | <b>Alcohol</b>                | <b>Both alcohol and drugs</b> | <b>Drugs</b> | <b>Negative results</b> |
| <i>Total (% out of 222)</i>      | 21 (9.5)                      | 19 (8.6)                      | 101 (45.5)   | 81 (36.5)               |
| <i>Time elapsed</i>              |                               |                               |              |                         |
| <6 h                             | 2 (9.5)                       | 2 (10.5)                      | 8 (7.9)      | 5 (6.2)                 |
| 6-12 h                           | 15 (71.4)                     | 11 (57.9)                     | 19 (18.8)    | 18 (22.2)               |
| 12-24 h                          | 2 (9.5)                       | 2 (10.5)                      | 23 (22.8)    | 16 (19.8)               |
| 24-48 h                          | 1 (4.8)                       | 1 (5.3)                       | 11 (10.9)    | 10 (12.3)               |
| >48h                             | 0 (0.0)                       | 2 (10.5)                      | 30 (29.7)    | 22 (27.2)               |
| No data available                | 1 (4.8)                       | 1 (5.3)                       | 10 (9.9)     | 10 (12.3)               |
|                                  |                               |                               |              |                         |
| <i>Age range</i>                 |                               |                               |              |                         |
| 14-17                            | 1 (4.8)                       | 0 (0.0)                       | 11 (10.9)    | 13 (16.0)               |
| 18-19                            | 5 (23.8)                      | 5 (26.3)                      | 13 (12.9)    | 18 (22.2)               |
| 20-29                            | 7 (33.3)                      | 8 (42.1)                      | 44 (43.6)    | 25 (30.9)               |
| 30-39                            | 5 (23.8)                      | 2 (10.5)                      | 18 (17.8)    | 12 (14.8)               |
| 40-49                            | 3 (14.3)                      | 4 (21.1)                      | 9 (8.9)      | 8 (9.9)                 |
| >50                              | 0 (0.0)                       | 0 (0.0)                       | 6 (5.9)      | 4 (4.9)                 |
| No data available                | 0 (0.0)                       | 0 (0.0)                       | 0 (0.0)      | 1 (1.2)                 |
|                                  |                               |                               |              |                         |
| <i>Perpetrators</i>              |                               |                               |              |                         |
| Unknown man                      | 1 (4.8)                       | 1 (5.3)                       | 14 (13.9)    | 12 (14.8)               |
| Partner                          | 6 (28.6)                      | 3 (15.8)                      | 27 (26.7)    | 16 (19.8)               |
| Known man                        | 5 (23.8)                      | 10 (52.6)                     | 29 (28.7)    | 30 (37.0)               |
| More assailants, but known men   | 1 (4.8)                       | 1 (5.3)                       | 8 (7.9)      | 4 (4.9)                 |
| More assailants, but unknown men | 4 (19.0)                      | 4 (21.1)                      | 12 (11.9)    | 14 (17.3)               |
| No data available                | 4 (19.0)                      | 0 (0.0)                       | 11 (10.9)    | 5 (6.2)                 |
|                                  |                               |                               |              |                         |
| <i>Injuries</i>                  |                               |                               |              |                         |
| Injuries                         | 19 (90.5)                     | 18 (94.7)                     | 71 (70.3)    | 48 (59.3)               |
| No injuries                      | 2 (9.5)                       | 1 (5.3)                       | 28 (27.7)    | 25 (30.9)               |
| No data available                | 0 (0.0)                       | 0 (0.0)                       | 2 (2.0)      | 8 (9.9)                 |

Note: In brackets, values are expressed as percentage of the total

**Table S3:** number of women reporting different signs/symptoms at clinical examination

|                           | Reported symptoms (n) |
|---------------------------|-----------------------|
| Multiples with amnesia    | 105                   |
| Nausea                    | 83                    |
| Pains                     | 47                    |
| Other                     | 33                    |
| Amnesia                   | 25                    |
| More physical symptoms    | 25                    |
| Multiples without amnesia | 16                    |
| Confusion                 | 6                     |
| Hallucinations            | 3                     |
| Vomiting / diarrhea       | 1                     |
| Dizziness                 | 1                     |
| Weakness / exhaustion     | 0                     |

4. **Supplementary Item S1:** raw data collection sheet

Page 1

|                      |                                                                                                                                                                                                                                                                                                                                                                                                             |
|----------------------|-------------------------------------------------------------------------------------------------------------------------------------------------------------------------------------------------------------------------------------------------------------------------------------------------------------------------------------------------------------------------------------------------------------|
| INFO<br>GENERALI     | codice paziente<br>n. scheda clinica<br>data evento<br>luogo evento<br>accesso SVS<br>tempo intercorso<br>note (dati salienti<br>racconto)<br>nazionalità<br>età<br>terapie in corso<br>tipologia farmaci<br>posologia<br>dati rilevanti<br>terapie attuate<br>modalità<br>cambio slip/vestiti<br>minzione/ defecazione<br>vomito<br>pulizia cavo orale<br>Sì/ no/quando<br>data<br>sintomatologia<br>altro |
| ANAMNESI             |                                                                                                                                                                                                                                                                                                                                                                                                             |
| ACCESSO PS           |                                                                                                                                                                                                                                                                                                                                                                                                             |
| IGIENE               |                                                                                                                                                                                                                                                                                                                                                                                                             |
| RAPPORTI<br>SESSUALI |                                                                                                                                                                                                                                                                                                                                                                                                             |
| EO GENERALE          |                                                                                                                                                                                                                                                                                                                                                                                                             |

Page 2

|                          |                                                                                                                                                                                                                                                                                                                                  |
|--------------------------|----------------------------------------------------------------------------------------------------------------------------------------------------------------------------------------------------------------------------------------------------------------------------------------------------------------------------------|
| EO LESIONI               | tipologia<br>sede<br>caratteristiche<br>dimensione<br>prognosi<br>lesioni<br>note<br>volontaria<br>obbligata<br>inconsapevole<br>tipologia<br>quantità<br>volontaria<br>obbligata<br>inconsapevole<br>tipologia<br>quantità<br>matrice biologica<br>intervallo<br>sintomi/prelievo<br>alcol<br>benzodiazepine<br>GHB<br>sostanze |
| EO GENITALE              |                                                                                                                                                                                                                                                                                                                                  |
| ASSUNZIONE<br>ALCOOL     |                                                                                                                                                                                                                                                                                                                                  |
| ASSUNZIONE<br>SOSTANZE   |                                                                                                                                                                                                                                                                                                                                  |
| tossicologia<br>NEGATIVA |                                                                                                                                                                                                                                                                                                                                  |

Page 3

|                   |                          |  |                    |
|-------------------|--------------------------|--|--------------------|
| concentrazioni    | tossicologia<br>POSITIVA |  | AMNESIA            |
| valori cutoff     |                          |  | CONFUSIONE         |
| creatinina        |                          |  | ALLUCINAZIONI      |
| note              |                          |  | <u>TORPORE</u>     |
| matrice biologica |                          |  | Denuncia d'ufficio |
| intervallo        |                          |  | Querela            |
| sintomi/prelievo  |                          |  |                    |
| alcol             |                          |  |                    |
| benzodiazepine    |                          |  |                    |
| GHB               |                          |  |                    |
| sostanza          |                          |  |                    |
| concentrazioni    |                          |  |                    |
| valori cutoff     |                          |  |                    |
| creatinina        |                          |  |                    |
| note              |                          |  |                    |
| trans/perm        |                          |  |                    |
| durata            |                          |  |                    |
| durata            |                          |  |                    |
| si/no             |                          |  |                    |
| si/no/durata      |                          |  |                    |
| si/no             |                          |  |                    |
| si/no             |                          |  |                    |

---

5. **Supplementary Item S2:** details on psychic manifestations coding

In the analysis phase, the recorded data on psychic manifestations were encoded as follows:

**AMNESIA**

yes/no

If yes Transitory=1  
Permanent=2

If yes <6h=1  
>6h=2

**CONFUSION**

yes/no

If yes <8h=1  
>8h=2

**HALLUCINATIONS**

yes/no

**NUMBNESS**

yes/no

If yes <8h=1  
>8h=2
